# Supplementary material for: The Complete Sequence of the Acacia ligulata Chloroplast Genome Reveals a Highly Divergent clpP1 Gene
Source: PubMed Central journal article supplement (PMC4425659; doi:10.1371/journal.pone.0125768), 2015-05-08
Supplement: pone.0125768.s002.pdf [file pone.0125768.s002.pdf]

|                                 | 10    | 20     | 30     | 40     | 50      | 60                             |
|---------------------------------|-------|--------|--------|--------|---------|--------------------------------|
| KC893635_GLYCINE_CANESCENS      | ATGCC | ATTGGT | GTTCCA | AAGAGT | ACCCTTT | CGAAGCCCTGGGGAAGAAGATGCATCTTGG |
| KC893637_GLYCINE_FALCATA        | ATGCC | ATTGGT | GTTCCA | AAGAGT | ACCCTTT | CGAAGCCCTGGGGAAGAAGATGCATCTTGG |
| KC893633_GLYCINE_TOMENTELLA     | ATGCC | ATTGGT | GTTCCA | AAGAGT | ACCCTTT | CGAAGCCCTGGGGAAGAAGATGCATCTTGG |
| KC893638_GLYCINE_SYNDETIKA      | ATGCC | ATTGGT | GTTCCA | AAGAGT | ACCCTTT | CGAAGCCCTGGGGAAGAAGATGCATCTTGG |
| KC893636_GLYCINE_DOLICHOCARPA   | ATGCC | ATTGGT | GTTCCA | AAGAGT | ACCCTTT | CGAAGCCCTGGGGAAGAAGATGCATCTTGG |
| KC893634_GLYCINE_STENOPHITA     | ATGCC | ATTGGT | GTTCCA | AAGAGT | ACCCTTT | CGAAGCCCTGGGGAAGAAGATGCATCTTGG |
| KC893632_GLYCINE_CYRTOLOBA      | ATGCC | ATTGGT | GTTCCA | AAGAGT | ACCCTTT | CGAAGCCCTGGGGAAGAAGATGCATCTTGG |
| KF611800_GLYCINE_SOJA           | ATGCC | ATTGGT | GTTCCA | AAGAGT | ACCCTTT | CGAAGCCCTGGGGAAGAAGATGCATCTTGG |
| NC_007942_GLYCINE_MAX           | ATGCC | ATTGGT | GTTCCA | AAGAGT | ACCCTTT | CGAAGCCCTGGGGAAGAAGATGCATCTTGG |
| JQ755301_VIGNA_UNGUICULATA      | ATGCC | ATTGGT | GTTCCA | AAGAGT | ACCCTTT | CGAAGCCCTGGGGAAGAAGATGCATCTTGG |
| NC_013843_VIGNA_RADIATA         | ATGCC | ATTGGT | GTTCCA | AAGAGT | ACCCTTT | CGAAGCCCTGGGGAAGAAGATGCATCTTGG |
| AP012598_VIGNA_ANGULARIS        | ATGCC | ATTGGT | GTTCCA | AAGAGT | ACCCTTT | CGAAGCCCTGGGGAAGAAGATGCATCTTGG |
| NC_009259_PHASEOLUS_VULGARIS    | ATGCC | ATTGGT | GTTCCA | AAGAGT | ACCCTTT | CGAAGCCCTGGGGAAGAAGATGCATCTTGG |
| NC_016708_MILLETTIA_PINNATA     | ATGCC | ATTGGT | GTTCCA | AAGAGT | ACCCTTT | CGAAGCCCTGGGGAAGAAGATGCATCTTGG |
| NC_014057_PISUM_SATIVUM         | ATGCC | ATTGGT | GTTCCA | AAGAGT | ACCCTTT | CGAAGCCCTGGGGAAGAAGATGCATCTTGG |
| NC_014063_LATHYRUS_SATIVUS      | ATGCC | ATTGGT | GTTCCA | AAGAGT | ACCCTTT | CGAAGCCCTGGGGAAGAAGATGCATCTTGG |
| EU849487_TRIFOLIUM_SUBTERRANEUM | ATGCC | ATTGGT | GTTCCA | AAGAGT | ACCCTTT | CGAAGCCCTGGGGAAGAAGATGCATCTTGG |
| NC_011163_CICER_ARIETINUM       | ATGCC | ATTGGT | GTTCCA | AAGAGT | ACCCTTT | CGAAGCCCTGGGGAAGAAGATGCATCTTGG |
| NC_003119_MEDICAGO_TRUNCATULA   | ATGCC | ATTGGT | GTTCCA | AAGAGT | ACCCTTT | CGAAGCCCTGGGGAAGAAGATGCATCTTGG |
| DQ226511_MORUS_INDICA           | ATGCC | ATTGGT | GTTCCA | AAGAGT | ACCCTTT | CGAAGCCCTGGGGAAGAAGATGCATCTTGG |
| NC_015996_PYRUS_PYRIFOLIA       | ATGCC | ATTGGT | GTTCCA | AAGAGT | ACCCTTT | CGAAGCCCTGGGGAAGAAGATGCATCTTGG |
| NC_014674_CASTANEA_MOLLISSIMA   | ATGCC | ATTGGT | GTTCCA | AAGAGT | ACCCTTT | CGAAGCCCTGGGGAAGAAGATGCATCTTGG |
| KC180787_EUCALYPTUS_GLOBULUS    | ATGCC | ATTGGT | GTTCCA | AAGAGT | ACCCTTT | CGAAGCCCTGGGGAAGAAGATGCATCTTGG |
| DQ119058_CUCUMIS_SATIVUS        | ATGCC | ATTGGT | GTTCCA | AAGAGT | ACCCTTT | CGAAGCCCTGGGGAAGAAGATGCATCTTGG |
| ACACIA_LIGULATA                 | ATGCC | ATTGGT | GTTCCA | AAGAGT | ACCCTTT | CGAAGCCCTGGGGAAGAAGATGCATCTTGG |
| NC_023090_LUPINUS_LUTEUS        | ATGCC | ATTGGT | GTTCCA | AAGAGT | ACCCTTT | CGAAGCCCTGGGGAAGAAGATGCATCTTGG |
| AP002983_LOTUS_JAPONICUS        | ATGCC | ATTGGT | GTTCCA | AAGAGT | ACCCTTT | CGAAGCCCTGGGGAAGAAGATGCATCTTGG |

|                                 | 70                                                 | 80           | 90 | 100 | 110 | 120 |
|---------------------------------|----------------------------------------------------|--------------|----|-----|-----|-----|
| KC893635_GLYCINE_CANESCENS      | GTTGATATATACAATCGACTTTATCGAGAAAGATTACTTTTTTTTAGGTC | CAAGAGGTTGAT |    |     |     |     |
| KC893637_GLYCINE_FALCATA        | GTTGATATATACAATCGACTTTATCGAGAAAGATTACTTTTTTTTAGGTC | CAAGAGGTTGAT |    |     |     |     |
| KC893633_GLYCINE_TOMENTELLA     | GTTGATATATACAATCGACTTTATCGAGAAAGATTACTTTTTTTTAGGTC | CAAGAGGTTGAT |    |     |     |     |
| KC893638_GLYCINE_SYNDETIKA      | GTTGATATATACAATCGACTTTATCGAGAAAGATTACTTTTTTTTAGGTC | CAAGAGGTTGAT |    |     |     |     |
| KC893636_GLYCINE_DOLICHOCARPA   | GTTGATATATACAATCGACTTTATCGAGAAAGATTACTTTTTTTTAGGTC | CAAGAGGTTGAT |    |     |     |     |
| KC893634_GLYCINE_STENOPHITA     | GTTGATATATACAATCGACTTTATCGAGAAAGATTACTTTTTTTTAGGTC | CAAGAGGTTGAT |    |     |     |     |
| KC893632_GLYCINE_CYRTOLOBA      | GTTGATATATACAATCGACTTTATCGAGAAAGATTACTTTTTTTTAGGTC | CAAGAGGTTGAT |    |     |     |     |
| KF611800_GLYCINE_SOJA           | GTTGATATATACAATCGACTTTATCGAGAAAGATTACTTTTTTTTAGGTC | CAAGAGGTTGAT |    |     |     |     |
| NC_007942_GLYCINE_MAX           | GTTGATATATACAATCGACTTTATCGAGAAAGATTACTTTTTTTTAGGTC | CAAGAGGTTGAT |    |     |     |     |
| JQ755301_VIGNA_UNGUICULATA      | GTTGATATATACAATCGACTTTATCGAGAAAGATTACTTTTTTTTAGGTC | CAAGAGGTTGAT |    |     |     |     |
| NC_013843_VIGNA_RADIATA         | GTTGATATATACAATCGACTTTATCGAGAAAGATTACTTTTTTTTAGGTC | CAAGAGGTTGAT |    |     |     |     |
| AP012598_VIGNA_ANGULARIS        | GTTGATATATACAATCGACTTTATCGAGAAAGATTACTTTTTTTTAGGTC | CAAGAGGTTGAT |    |     |     |     |
| NC_009259_PHASEOLUS_VULGARIS    | GTTGATATATACAATCGACTTTATCGAGAAAGATTACTTTTTTTTAGGTC | CAAGAGGTTGAT |    |     |     |     |
| NC_016708_MILLETTIA_PINNATA     | GTTGATATATACAATCGACTTTATCGAGAAAGATTACTTTTTTTTAGGTC | CAAGAGGTTGAT |    |     |     |     |
| NC_014057_PISUM_SATIVUM         | GTTGATATATACAATCGACTTTATCGAGAAAGATTACTTTTTTTTAGGTC | CAAGAGGTTGAT |    |     |     |     |
| NC_014063_LATHYRUS_SATIVUS      | GTTGATATATACAATCGACTTTATCGAGAAAGATTACTTTTTTTTAGGTC | CAAGAGGTTGAT |    |     |     |     |
| EU849487_TRIFOLIUM_SUBTERRANEUM | GTTGATATATACAATCGACTTTATCGAGAAAGATTACTTTTTTTTAGGTC | CAAGAGGTTGAT |    |     |     |     |
| NC_011163_CICER_ARIETINUM       | GTTGATATATACAATCGACTTTATCGAGAAAGATTACTTTTTTTTAGGTC | CAAGAGGTTGAT |    |     |     |     |
| NC_003119_MEDICAGO_TRUNCATULA   | GTTGATATATACAATCGACTTTATCGAGAAAGATTACTTTTTTTTAGGTC | CAAGAGGTTGAT |    |     |     |     |
| DQ226511_MORUS_INDICA           | GTTGATATATACAATCGACTTTATCGAGAAAGATTACTTTTTTTTAGGTC | CAAGAGGTTGAT |    |     |     |     |
| NC_015996_PYRUS_PYRIFOLIA       | GTTGATATATACAATCGACTTTATCGAGAAAGATTACTTTTTTTTAGGTC | CAAGAGGTTGAT |    |     |     |     |
| NC_014674_CASTANEA_MOLLISSIMA   | GTTGATATATACAATCGACTTTATCGAGAAAGATTACTTTTTTTTAGGTC | CAAGAGGTTGAT |    |     |     |     |
| KC180787_EUCALYPTUS_GLOBULUS    | GTTGATATATACAATCGACTTTATCGAGAAAGATTACTTTTTTTTAGGTC | CAAGAGGTTGAT |    |     |     |     |
| DQ119058_CUCUMIS_SATIVUS        | GTTGATATATACAATCGACTTTATCGAGAAAGATTACTTTTTTTTAGGTC | CAAGAGGTTGAT |    |     |     |     |
| ACACIA_LIGULATA                 | GTTGATATATACAATCGACTTTATCGAGAAAGATTACTTTTTTTTAGGTC | CAAGAGGTTGAT |    |     |     |     |
| NC_023090_LUPINUS_LUTEUS        | GTTGATATATACAATCGACTTTATCGAGAAAGATTACTTTTTTTTAGGTC | CAAGAGGTTGAT |    |     |     |     |
| AP002983_LOTUS_JAPONICUS        | GTTGATATATACAATCGACTTTATCGAGAAAGATTACTTTTTTTTAGGTC | CAAGAGGTTGAT |    |     |     |     |

|                               | 130   | 140                                               | 150 | 160 | 170 | 180 |
|-------------------------------|-------|---------------------------------------------------|-----|-----|-----|-----|
| KC893635_GLYCINE_CANESCENS    | AGTGA | AATATCGAATCAACTAATTAGTCTTATGGTATATCTTAGTATAGAGGAA | --- | GAG |     |     |
| KC893637_GLYCINE_FALCATA      | AGTGA | AATATCGAATCAACTAATTAGTCTTATGGTATATCTTAGTATAGAGGAA | --- | GAG |     |     |
| KC893633_GLYCINE_TOMENTELLA   | AGTGA | AATATCGAATCAACTAATTAGTCTTATGGTATATCTTAGTATAGAGGAA | --- | GAG |     |     |
| KC893638_GLYCINE_SYNDETIKA    | AGTGA | AATATCGAATCAACTAATTAGTCTTATGGTATATCTTAGTATAGAGGAA | --- | GAG |     |     |
| KC893636_GLYCINE_DOLICHOCARPA | AGTGA | AATATCGAATCAACTAATTAGTCTTATGGTATATCTTAGTATAGAGGAA | --- | GAG |     |     |
| KC893634_GLYCINE_STENOPHITA   | AGTGA | AATATCGAATCAACTAATTAGTCTTATGGTATATCTTAGTATAGAGGAA | --- | GAG |     |     |
| KC893632_GLYCINE_CYRTOLOBA    | AGTGA | AATATCGAATCAACTAATTAGTCTTATGGTATATCTTAGTATAGAGGAA | --- | GAG |     |     |
| KF611800_GLYCINE_SOJA         | AGTGA | AATATCGAATCAACTAATTAGTCTTATGGTATATCTTAGTATAGAGGAA | --- | GAG |     |     |
| NC_007942_GLYCINE_MAX         | AGTGA | AATATCGAATCAACTAATTAGTCTTATGGTATATCTTAGTATAGAGGAA | --- | GAG |     |     |
| JQ755301_VIGNA_UNGUICULATA    | AGTGA | AATATCGAATCAACTAATTAGTCTTATGGTATATCTTAGTATAGAGGAA | --- | GAG |     |     |
| NC_013843_VIGNA_RADIATA       | AGTGA | AATATCGAATCAACTAATTAGTCTTATGGTATATCTTAGTATAGAGGAA | --- | GAG |     |     |
| AP012598_VIGNA_ANGULARIS      | AGTGA | AATATCGAATCAACTAATTAGTCTTATGGTATATCTTAGTATAGAGGAA | --- | GAG |     |     |
| NC_009259_PHASEOLUS_VULGARIS  | AGTGA | AATATCGAATCAACTAATTAGTCTTATGGTATATCTTAGTATAGAGGAA | --- | GAG |     |     |
| NC_016708_MILLETTIA_PINNATA   | AGTGA | AATATCGAATCAACTAATTAGTCTTATGGTATATCTTAGTATAGAGGAA | --- | GAG |     |     |
| NC_014057_PISUM_SATIVUM       | AGTGA | AATATCGAATCAACTAATTAGTCTTATGGTATATCTTAGTATAGAGGAA | --- | GAG |     |     |







|                                 |                                            |
|---------------------------------|--------------------------------------------|
| KC893634_GLYCINE_STENOPHITA     | -----TAA                                   |
| KC893632_GLYCINE_CYRTOLOBA      | -----TAA                                   |
| KF611800_GLYCINE_SOJA           | -----TAA                                   |
| NC_007942_GLYCINE_MAX           | -----TAA                                   |
| JQ755301_VIGNA_UNGUICULATA      | -----TAA                                   |
| NC_013843_VIGNA_RADIIATA        | -----TAA                                   |
| AP012598_VIGNA_ANGULARIS        | -----TAA                                   |
| NC_009259_PHASEOLUS_VULGARIS    | -----TAA                                   |
| NC_016708_MILLETTIA_PINNATA     | -----TAA                                   |
| NC_014057_PISUM_SATIVUM         | TGG-----TAA                                |
| NC_014063_LATHYRUS_SATIVUS      | ACGGAAGCAATTTTTGATTCCGGAGCAGATTCTTTTTTTTAA |
| EU849487_TRIFOLIUM_SUBTERRANEUM | TTG-----TAA                                |
| NC_011163_CICER_ARIETINUM       | -----TGA                                   |
| NC_003119_MEDICAGO_TRUNCATULA   | -----TAA                                   |
| DQ226511_MORUS_INDICA           | -----TAA                                   |
| NC_015996_PYRUS_PYRIFOLIA       | -----TAA                                   |
| NC_014674_CASTANEA_MOLLISSIMA   | -----TAA                                   |
| KC180787_EUCALYPTUS_GLOBULUS    | -----TAA                                   |
| DQ119058_CUCUMIS_SATIVUS        | -----TAA                                   |
| ACACIA_LIGULATA                 | AAATATTGGGAATGGGAAGAAGATGTA-----TAG        |
| NC_023090_LUPINUS_LUTEUS        | -----TAA                                   |
| AP002983_LOTUS_JAPONICUS        | -----TAA                                   |
